# Supplementary material
Source: PubMed Central journal article supplement (PMC1586052)
Supplement: plntphys_pp.106.080358_1.pdf [file plntphys_pp.106.080358_1.pdf]

**Supplemental Table 1. GO terms for the Flavonoid biosynthesis pathway and genes identified through pathway-level co-expression analysis.** The ranking is sorted for descending counts within the pathway. The last two columns give the number of genes within or outside the pathway that are annotated with the term listed in the second column.

| GO id      | GO term                                                                                                                                                                                             | Genes within pathway | Genes outside pathway |
|------------|-----------------------------------------------------------------------------------------------------------------------------------------------------------------------------------------------------|----------------------|-----------------------|
| GO:0008372 | cellular component unknown                                                                                                                                                                          | 13                   | 28                    |
| GO:0016207 | 4-coumarate-CoA ligase activity                                                                                                                                                                     | 12                   | 0                     |
| GO:0008152 | metabolism                                                                                                                                                                                          | 8                    | 7                     |
| GO:0019350 | teichoic acid biosynthesis                                                                                                                                                                          | 8                    | 0                     |
| GO:0009234 | menaquinone biosynthesis                                                                                                                                                                            | 8                    | 0                     |
| GO:0009698 | phenylpropanoid metabolism                                                                                                                                                                          | 7                    | 0                     |
| GO:0009813 | flavonoid biosynthesis                                                                                                                                                                              | 7                    | 0                     |
| GO:0008299 | isoprenoid biosynthesis                                                                                                                                                                             | 6                    | 0                     |
| GO:0009507 | chloroplast                                                                                                                                                                                         | 5                    | 24                    |
| GO:0009411 | response to UV                                                                                                                                                                                      | 4                    | 0                     |
| GO:0016706 | "oxidoreductase activity, acting on paired donors, with incorporation or reduction of molecular oxygen, 2-oxoglutarate as one donor, and incorporation of one atom each of oxygen into both donors" | 4                    | 0                     |
| GO:0009058 | biosynthesis                                                                                                                                                                                        | 3                    | 2                     |
| GO:0009699 | phenylpropanoid biosynthesis                                                                                                                                                                        | 3                    | 1                     |
| GO:0008415 | acyltransferase activity                                                                                                                                                                            | 3                    | 1                     |
| GO:0004315 | 3-oxoacyl-[acyl-carrier protein] synthase activity                                                                                                                                                  | 3                    | 0                     |
| GO:0006633 | fatty acid biosynthesis                                                                                                                                                                             | 3                    | 0                     |
| GO:0005739 | mitochondrion                                                                                                                                                                                       | 2                    | 7                     |
| GO:0005783 | endoplasmic reticulum                                                                                                                                                                               | 2                    | 1                     |
| GO:0009695 | jasmonic acid biosynthesis                                                                                                                                                                          | 2                    | 1                     |
| GO:0009611 | response to wounding                                                                                                                                                                                | 2                    | 1                     |
| GO:0005506 | iron ion binding                                                                                                                                                                                    | 2                    | 1                     |
| GO:0016216 | isopenicillin-N synthase activity                                                                                                                                                                   | 2                    | 0                     |
| GO:0005777 | peroxisome                                                                                                                                                                                          | 2                    | 0                     |
| GO:0045430 | chalcone isomerase activity                                                                                                                                                                         | 2                    | 0                     |
| GO:0009705 | vacuolar membrane (sensu Magnoliophyta)                                                                                                                                                             | 2                    | 0                     |
| GO:0004321 | fatty-acyl-CoA synthase activity                                                                                                                                                                    | 2                    | 0                     |
| GO:0009621 | response to pathogenic fungi                                                                                                                                                                        | 2                    | 0                     |
| GO:0000004 | biological process unknown                                                                                                                                                                          | 1                    | 41                    |
| GO:0005554 | molecular function unknown                                                                                                                                                                          | 1                    | 34                    |
| GO:0003824 | catalytic activity                                                                                                                                                                                  | 1                    | 7                     |
| GO:0016210 | naringenin-chalcone synthase activity                                                                                                                                                               | 1                    | 0                     |
| GO:0016208 | AMP binding                                                                                                                                                                                         | 1                    | 0                     |
| GO:0045486 | naringenin 3-dioxygenase activity                                                                                                                                                                   | 1                    | 0                     |
| GO:0005727 | extrachromosomal circular DNA                                                                                                                                                                       | 1                    | 0                     |
| GO:0042406 | extrinsic to endoplasmic reticulum membrane                                                                                                                                                         | 1                    | 0                     |
| GO:0009715 | chalcone biosynthesis                                                                                                                                                                               | 1                    | 0                     |
| GO:0016405 | CoA-ligase activity                                                                                                                                                                                 | 1                    | 0                     |
| GO:0047473 | D-alanine-poly(phosphoribitol) ligase activity                                                                                                                                                      | 1                    | 0                     |
| GO:0008756 | o-succinylbenzoate-CoA ligase activity                                                                                                                                                              | 1                    | 0                     |
| GO:0019748 | secondary metabolism                                                                                                                                                                                | 1                    | 0                     |
| GO:0016874 | ligase activity                                                                                                                                                                                     | 1                    | 0                     |
| GO:0012505 | endomembrane system                                                                                                                                                                                 | 0                    | 30                    |
| GO:0003677 | DNA binding                                                                                                                                                                                         | 0                    | 16                    |
| GO:0005634 | nucleus                                                                                                                                                                                             | 0                    | 14                    |
| GO:0003700 | transcription factor activity                                                                                                                                                                       | 0                    | 14                    |
| GO:0016020 | membrane                                                                                                                                                                                            | 0                    | 9                     |
| GO:0005524 | ATP binding                                                                                                                                                                                         | 0                    | 8                     |

|            |                                                           |   |   |
|------------|-----------------------------------------------------------|---|---|
| GO:0006355 | "regulation of transcription, DNA-dependent"              | 0 | 7 |
| GO:0006869 | lipid transport                                           | 0 | 7 |
| GO:0008289 | lipid binding                                             | 0 | 7 |
| GO:0031225 | anchored to membrane                                      | 0 | 6 |
| GO:0004497 | monooxygenase activity                                    | 0 | 4 |
| GO:0016757 | "transferase activity, transferring glycosyl groups"      | 0 | 4 |
| GO:0006118 | electron transport                                        | 0 | 4 |
| GO:0005737 | cytoplasm                                                 | 0 | 4 |
| GO:0004674 | protein serine/threonine kinase activity                  | 0 | 4 |
| GO:0004672 | protein kinase activity                                   | 0 | 4 |
| GO:0009908 | flower development                                        | 0 | 4 |
| GO:0006468 | protein amino acid phosphorylation                        | 0 | 4 |
| GO:0005975 | carbohydrate metabolism                                   | 0 | 4 |
| GO:0051287 | NAD binding                                               | 0 | 3 |
| GO:0016021 | integral to membrane                                      | 0 | 3 |
| GO:0005525 | GTP binding                                               | 0 | 3 |
| GO:0003676 | nucleic acid binding                                      | 0 | 3 |
| GO:0006810 | transport                                                 | 0 | 3 |
| GO:0004553 | "hydrolase activity, hydrolyzing O-glycosyl compounds"    | 0 | 3 |
| GO:0016491 | oxidoreductase activity                                   | 0 | 3 |
| GO:0009556 | microsporogenesis                                         | 0 | 3 |
| GO:0019825 | oxygen binding                                            | 0 | 3 |
| GO:0005509 | calcium ion binding                                       | 0 | 3 |
| GO:0009405 | pathogenesis                                              | 0 | 3 |
| GO:0016301 | kinase activity                                           | 0 | 3 |
| GO:0045449 | regulation of transcription                               | 0 | 3 |
| GO:0006499 | N-terminal protein myristoylation                         | 0 | 3 |
| GO:0005576 | extracellular region                                      | 0 | 3 |
| GO:0006418 | tRNA aminoacylation for protein translation               | 0 | 3 |
| GO:0006012 | galactose metabolism                                      | 0 | 2 |
| GO:0003854 | 3-beta-hydroxy-delta5-steroid dehydrogenase activity      | 0 | 2 |
| GO:0004812 | tRNA ligase activity                                      | 0 | 2 |
| GO:0016999 | antibiotic metabolism                                     | 0 | 2 |
| GO:0016740 | transferase activity                                      | 0 | 2 |
| GO:0030599 | pectinesterase activity                                   | 0 | 2 |
| GO:0016758 | "transferase activity, transferring hexosyl groups"       | 0 | 2 |
| GO:0008460 | "dTDP-glucose 4,6-dehydratase activity"                   | 0 | 2 |
| GO:0004043 | L-aminoadipate-semialdehyde dehydrogenase activity        | 0 | 2 |
| GO:0009225 | nucleotide-sugar metabolism                               | 0 | 2 |
| GO:0016789 | carboxylic ester hydrolase activity                       | 0 | 2 |
| GO:0006952 | defense response                                          | 0 | 2 |
| GO:0004685 | calcium- and calmodulin-dependent protein kinase activity | 0 | 2 |
| GO:0006694 | steroid biosynthesis                                      | 0 | 2 |
| GO:0009793 | embryonic development (sensu Magnoliophyta)               | 0 | 2 |
| GO:0009809 | lignin biosynthesis                                       | 0 | 2 |
| GO:0042773 | ATP synthesis coupled electron transport                  | 0 | 2 |
| GO:0005507 | copper ion binding                                        | 0 | 2 |
| GO:0003913 | DNA photolyase activity                                   | 0 | 2 |
| GO:0006725 | aromatic compound metabolism                              | 0 | 2 |
| GO:0019866 | inner membrane                                            | 0 | 2 |
| GO:0048443 | stamen development                                        | 0 | 2 |
| GO:0048481 | ovule development                                         | 0 | 2 |
| GO:0003978 | UDP-glucose 4-epimerase activity                          | 0 | 2 |
| GO:0004650 | polygalacturonase activity                                | 0 | 2 |
| GO:0009505 | cell wall (sensu Magnoliophyta)                           | 0 | 2 |
| GO:0006486 | protein amino acid glycosylation                          | 0 | 2 |
| GO:0015031 | protein transport                                         | 0 | 2 |

|            |                                                                                         |   |   |
|------------|-----------------------------------------------------------------------------------------|---|---|
| GO:0005788 | endoplasmic reticulum lumen                                                             | 0 | 1 |
| GO:0008378 | galactosyltransferase activity                                                          | 0 | 1 |
| GO:0008270 | zinc ion binding                                                                        | 0 | 1 |
| GO:0006824 | cobalt ion transport                                                                    | 0 | 1 |
| GO:0007169 | transmembrane receptor protein tyrosine kinase signaling pathway                        | 0 | 1 |
| GO:0016628 | "oxidoreductase activity, acting on the CH-CH group of donors, NAD or NADP as acceptor" | 0 | 1 |
| GO:0016998 | cell wall catabolism                                                                    | 0 | 1 |
| GO:0000160 | two-component signal transduction system (phosphorelay)                                 | 0 | 1 |
| GO:0006308 | DNA catabolism                                                                          | 0 | 1 |
| GO:0004713 | protein-tyrosine kinase activity                                                        | 0 | 1 |
| GO:0003988 | acetyl-CoA C-acyltransferase activity                                                   | 0 | 1 |
| GO:0004089 | carbonate dehydratase activity                                                          | 0 | 1 |
| GO:0005794 | Golgi apparatus                                                                         | 0 | 1 |
| GO:0016168 | chlorophyll binding                                                                     | 0 | 1 |
| GO:0015846 | polyamine transport                                                                     | 0 | 1 |
| GO:0005792 | microsome                                                                               | 0 | 1 |
| GO:0015725 | gluconate transport                                                                     | 0 | 1 |
| GO:0003924 | GTPase activity                                                                         | 0 | 1 |
| GO:0046409 | p-coumarate 3-hydroxylase activity                                                      | 0 | 1 |
| GO:0004386 | helicase activity                                                                       | 0 | 1 |
| GO:0003841 | 1-acylglycerol-3-phosphate O-acyltransferase activity                                   | 0 | 1 |
| GO:0008171 | O-methyltransferase activity                                                            | 0 | 1 |
| GO:0007155 | cell adhesion                                                                           | 0 | 1 |
| GO:0006839 | mitochondrial transport                                                                 | 0 | 1 |
| GO:0046487 | glyoxylate metabolism                                                                   | 0 | 1 |
| GO:0009765 | photosynthesis light harvesting                                                         | 0 | 1 |
| GO:0008679 | 2-hydroxy-3-oxopropionate reductase activity                                            | 0 | 1 |
| GO:0000719 | photoreactive repair                                                                    | 0 | 1 |
| GO:0004064 | arylesterase activity                                                                   | 0 | 1 |
| GO:0005829 | cytosol                                                                                 | 0 | 1 |
| GO:0004828 | serine-tRNA ligase activity                                                             | 0 | 1 |
| GO:0000151 | ubiquitin ligase complex                                                                | 0 | 1 |
| GO:0008677 | 2-dehydropantoate 2-reductase activity                                                  | 0 | 1 |
| GO:0016567 | protein ubiquitination                                                                  | 0 | 1 |
| GO:0045551 | cinnamyl-alcohol dehydrogenase activity                                                 | 0 | 1 |
| GO:0009877 | nodulation                                                                              | 0 | 1 |
| GO:0016563 | transcriptional activator activity                                                      | 0 | 1 |
| GO:0019861 | flagellum                                                                               | 0 | 1 |
| GO:0006457 | protein folding                                                                         | 0 | 1 |
| GO:0015706 | nitrate transport                                                                       | 0 | 1 |
| GO:0017004 | cytochrome complex assembly                                                             | 0 | 1 |
| GO:0019656 | heterolactate fermentation                                                              | 0 | 1 |
| GO:0005489 | electron transporter activity                                                           | 0 | 1 |
| GO:0005488 | binding                                                                                 | 0 | 1 |
| GO:0004831 | tyrosine-tRNA ligase activity                                                           | 0 | 1 |
| GO:0004830 | tryptophan-tRNA ligase activity                                                         | 0 | 1 |
| GO:0008565 | protein transporter activity                                                            | 0 | 1 |
| GO:0009941 | chloroplast envelope                                                                    | 0 | 1 |
| GO:0042626 | "ATPase activity, coupled to transmembrane movement of substances"                      | 0 | 1 |
| GO:0006573 | valine metabolism                                                                       | 0 | 1 |
| GO:0019430 | removal of superoxide radicals                                                          | 0 | 1 |
| GO:0006206 | pyrimidine base metabolism                                                              | 0 | 1 |
| GO:0016597 | amino acid binding                                                                      | 0 | 1 |
| GO:0006886 | intracellular protein transport                                                         | 0 | 1 |
| GO:0004664 | prephenate dehydratase activity                                                         | 0 | 1 |

|            |                                                            |   |   |
|------------|------------------------------------------------------------|---|---|
| GO:0008643 | carbohydrate transport                                     | 0 | 1 |
| GO:0005528 | FK506 binding                                              | 0 | 1 |
| GO:0045036 | protein-chloroplast targeting                              | 0 | 1 |
| GO:0008757 | S-adenosylmethionine-dependent methyltransferase activity  | 0 | 1 |
| GO:0007186 | G-protein coupled receptor protein signaling pathway       | 0 | 1 |
| GO:0015144 | carbohydrate transporter activity                          | 0 | 1 |
| GO:0016149 | "translation release factor activity, codon specific"      | 0 | 1 |
| GO:0006811 | ion transport                                              | 0 | 1 |
| GO:0006817 | phosphate transport                                        | 0 | 1 |
| GO:0048497 | maintenance of floral organ identity                       | 0 | 1 |
| GO:0015627 | type II protein secretion system complex                   | 0 | 1 |
| GO:0019395 | fatty acid oxidation                                       | 0 | 1 |
| GO:0004842 | ubiquitin-protein ligase activity                          | 0 | 1 |
| GO:0042545 | cell wall modification                                     | 0 | 1 |
| GO:0015071 | protein phosphatase type 2C activity                       | 0 | 1 |
| GO:0009707 | chloroplast outer membrane                                 | 0 | 1 |
| GO:0003743 | translation initiation factor activity                     | 0 | 1 |
| GO:0006434 | seryl-tRNA aminoacylation                                  | 0 | 1 |
| GO:0006437 | tyrosyl-tRNA aminoacylation                                | 0 | 1 |
| GO:0006436 | tryptophanyl-tRNA aminoacylation                           | 0 | 1 |
| GO:0008026 | ATP-dependent helicase activity                            | 0 | 1 |
| GO:0006730 | one-carbon compound metabolism                             | 0 | 1 |
| GO:0006865 | amino acid transport                                       | 0 | 1 |
| GO:0044249 | cellular biosynthesis                                      | 0 | 1 |
| GO:0008704 | 5-carboxymethyl-2-hydroxyruconate delta-isomerase activity | 0 | 1 |
| GO:0009650 | UV protection                                              | 0 | 1 |
| GO:0045226 | extracellular polysaccharide biosynthesis                  | 0 | 1 |
| GO:0006461 | protein complex assembly                                   | 0 | 1 |
| GO:0007264 | small GTPase mediated signal transduction                  | 0 | 1 |
| GO:0009554 | megasporogenesis                                           | 0 | 1 |
| GO:0008194 | UDP-glycosyltransferase activity                           | 0 | 1 |
| GO:0003755 | peptidyl-prolyl cis-trans isomerase activity               | 0 | 1 |
| GO:0004757 | sepiapterin reductase activity                             | 0 | 1 |
| GO:0008831 | dTDP-4-dehydrorhamnose reductase activity                  | 0 | 1 |
| GO:0004616 | phosphogluconate dehydrogenase (decarboxylating) activity  | 0 | 1 |
| GO:0004103 | choline kinase activity                                    | 0 | 1 |
| GO:0015450 | protein translocase activity                               | 0 | 1 |
| GO:0005351 | sugar porter activity                                      | 0 | 1 |
| GO:0009408 | response to heat                                           | 0 | 1 |
| GO:0008200 | ion channel inhibitor activity                             | 0 | 1 |
| GO:0009094 | L-phenylalanine biosynthesis                               | 0 | 1 |
| GO:0009522 | photosystem I                                              | 0 | 1 |
| GO:0016853 | isomerase activity                                         | 0 | 1 |
| GO:0005515 | protein binding                                            | 0 | 1 |
| GO:0004519 | endonuclease activity                                      | 0 | 1 |
| GO:0008654 | phospholipid biosynthesis                                  | 0 | 1 |
| GO:0005743 | mitochondrial inner membrane                               | 0 | 1 |
| GO:0009933 | meristem organization                                      | 0 | 1 |
| GO:0003723 | RNA binding                                                | 0 | 1 |
| GO:0008382 | iron superoxide dismutase activity                         | 0 | 1 |
| GO:0048440 | carpel development                                         | 0 | 1 |
| GO:0015628 | type II protein secretion system                           | 0 | 1 |
| GO:0006098 | pentose-phosphate shunt                                    | 0 | 1 |
| GO:0042597 | periplasmic space                                          | 0 | 1 |
| GO:0004871 | signal transducer activity                                 | 0 | 1 |
| GO:0009543 | thylakoid lumen (sensu Viridiplantae)                      | 0 | 1 |

|            |                                                 |   |   |
|------------|-------------------------------------------------|---|---|
| GO:0000103 | sulfate assimilation                            | 0 | 1 |
| GO:0009103 | lipopolysaccharide biosynthesis                 | 0 | 1 |
| GO:0008446 | "GDP-mannose 4,6-dehydratase activity"          | 0 | 1 |
| GO:0016844 | strictosidine synthase activity                 | 0 | 1 |
| GO:0008442 | 3-hydroxyisobutyrate dehydrogenase activity     | 0 | 1 |
| GO:0009821 | alkaloid biosynthesis                           | 0 | 1 |
| GO:0019871 | sodium channel inhibitor activity               | 0 | 1 |
| GO:0006281 | DNA repair                                      | 0 | 1 |
| GO:0015758 | glucose transport                               | 0 | 1 |
| GO:0015698 | inorganic anion transport                       | 0 | 1 |
| GO:0048533 | sporocyte differentiation                       | 0 | 1 |
| GO:0015757 | galactose transport                             | 0 | 1 |
| GO:0006857 | oligopeptide transport                          | 0 | 1 |
| GO:0046423 | allene-oxide cyclase activity                   | 0 | 1 |
| GO:0006464 | protein modification                            | 0 | 1 |
| GO:0003904 | deoxyribodipyrimidine photo-lyase activity      | 0 | 1 |
| GO:0009052 | "pentose-phosphate shunt, non-oxidative branch" | 0 | 1 |
| GO:0008191 | metalloendopeptidase inhibitor activity         | 0 | 1 |
| GO:0009051 | "pentose-phosphate shunt, oxidative branch"     | 0 | 1 |
| GO:0005618 | cell wall                                       | 0 | 1 |
| GO:0005478 | intracellular transporter activity              | 0 | 1 |
| GO:0006415 | translational termination                       | 0 | 1 |
| GO:0006413 | translational initiation                        | 0 | 1 |
| GO:0045941 | positive regulation of transcription            | 0 | 1 |
